# Supplementary material for: Acute kidney injury in patients treated with immune checkpoint inhibitors
Source: PubMed Central journal article supplement — J Immunother Cancer. 2021 Oct 8;9(10):e003467. doi: 10.1136/jitc-2021-003467 (PMC8496384; doi:10.1136/jitc-2021-003467), 2021-10-08
Supplement: jitc-2021-003467supp001.pdf [file jitc-2021-003467supp001.pdf]

## **Supplemental Appendix**

### **Acute Kidney Injury in Patients Treated with Immune Checkpoint Inhibitors**

## Table of Contents

|                                                                                                    |              |
|----------------------------------------------------------------------------------------------------|--------------|
| <b>Supplemental Tables</b> .....                                                                   | <b>3-11</b>  |
| Table S1. Collaborating Institutions .....                                                         | 3            |
| Table S2. Criteria for ICPI-AKI .....                                                              | 4            |
| Table S3. Kidney Disease: Improving Global Outcomes (KDIGO) Criteria for Acute Kidney Injury ..... | 5            |
| Table S4. Characteristics of Biopsied versus Non-Biopsied Patients with ICPI-AKI .....             | 6            |
| Table S5. Clinical Features of Patients Receiving Non-Corticosteroid Immunosuppression .....       | 7            |
| Table S6. Characteristics of ICPI-AKI Patients with and without Renal Recovery .....               | 8-9          |
| Table S7. Characteristics of Patients Rechallenged Versus Not Rechallenged after ICPI-AKI .....    | 10           |
| Table S8. Characteristics of Patients with and without Recurrent ICPI-AKI after Rechallenge .....  | 11           |
| <b>Supplemental Figures</b> .....                                                                  | <b>12-19</b> |
| Figure S1. Participating Sites in ICPI-AKI Consortium. ....                                        | 12           |
| Figure S2. ICPI Initiation by Year among Patients with and without ICPI-AKI .....                  | 13           |
| Figure S3. Risk Factors for Stage 2 ICPI-AKI or Higher .....                                       | 14           |
| Figure S4. Predictors of Renal Recovery among Patients Treated with Corticosteroids .....          | 15           |
| Figure S5. Flowchart of Patients with ICPI-AKI .....                                               | 16           |
| Figure S6. Months from ICPI-AKI to Rechallenge .....                                               | 17           |
| Figure S7. Survival among Patients Rechallenged versus Not Rechallenged .....                      | 18           |
| Figure S8. Frequency and Severity of Recurrent ICPI-AKI after Rechallenge .....                    | 19           |
| <b>Acknowledgements</b> .....                                                                      | <b>20</b>    |
| <b>References</b> .....                                                                            | <b>21</b>    |
| <b>Case Report Form</b>                                                                            |              |

**Table S1: Collaborating Institutions**

| <b>Collaborating Institution</b>                          | <b>Location</b>     | <b>No. ICPI-AKI cases (n=429)</b> |
|-----------------------------------------------------------|---------------------|-----------------------------------|
| <i>United States</i>                                      |                     |                                   |
| Brigham and Women's Hospital/Dana-Farber Cancer Institute | Boston, MA          | 20                                |
| Duke University                                           | Durham, NC          | 14                                |
| Massachusetts General Hospital                            | Boston, MA          | 42                                |
| Mayo Clinic                                               | Rochester, MN       | 24                                |
| MD Anderson Cancer Center                                 | Houston, TX         | 22                                |
| Memorial Sloane Kettering Cancer Center                   | New York, NY        | 18                                |
| Mt. Sinai                                                 | New York, NY        | 5                                 |
| Northwell Health System                                   | Long Island, NY     | 15                                |
| Northwestern                                              | Chicago, IL         | 13                                |
| Ohio State University                                     | Columbus, Ohio      | 36                                |
| Stanford Healthcare                                       | Palo Alto, CA       | 22                                |
| University Hospitals Cleveland Medical Center             | Cleveland, OH       | 14                                |
| University of Alabama Birmingham                          | Birmingham, AL      | 6                                 |
| University of California, Los Angeles                     | Los Angeles, CA     | 6                                 |
| University of California, San Francisco                   | San Francisco, CA   | 11                                |
| University of Florida, Gainesville                        | Gainesville, FL     | 7                                 |
| University of Miami                                       | Miami, FL           | 7                                 |
| University of Pennsylvania                                | Philadelphia, PA    | 5                                 |
| University of Virginia                                    | Charlottesville, VA | 7                                 |
| University of Washington                                  | Seattle, WA         | 12                                |
| <i>International</i>                                      |                     |                                   |
| Charite Hospital                                          | Berlin, Germany     | 11                                |
| Chi-Mei Medical Center                                    | Tainan, Taiwan      | 10                                |
| Geneva University Hospital                                | Geneva, Switzerland | 7                                 |
| Guy's and St. Thomas NHS Hospital                         | London, England     | 28                                |
| Heidelberg University                                     | Heidelberg, Germany | 2                                 |
| Pitie-Salpetriere Hospital                                | Paris, France       | 7                                 |
| Sheba Medical Center                                      | Ramat Gan, Israel   | 8                                 |
| University of Toronto                                     | Toronto, Canada     | 6                                 |
| Universitair Ziekenhuis Leuven                            | Leuven, Belgium     | 14                                |
| Vall d'Hebron University Hospital                         | Barcelona, Spain    | 30                                |

Abbreviations: ICPI-AKI, immune checkpoint-inhibitor associated acute kidney injury

**Table S2: Criteria for ICPI-AKI**

---

|                                                                                                                    |
|--------------------------------------------------------------------------------------------------------------------|
| <b>AKI that was directly attributed to the ICPI by the treating provider AND either of the following criteria:</b> |
| <b>Criteria 1:</b> Increase in SCr $\geq$ 100% from baseline OR treatment with RRT                                 |
| <b>Criteria 2:</b> Increase in SCr $\geq$ 50% from baseline AND at least one of the following:                     |
| 1) ATIN on biopsy                                                                                                  |
| 2) ICPI held for at least one cycle due to concern for ICPI-AKI                                                    |
| 3) Treatment with corticosteroids due to concern for ICPI-AKI                                                      |

---

Abbreviations: AKI, acute kidney injury; ATIN, acute tubulointerstitial nephritis; ICPI, immune checkpoint inhibitor; RRT, renal replacement therapy; SCr, serum creatinine.

**Table S3: Kidney Disease: Improving Global Outcomes (KDIGO) Criteria for Acute Kidney Injury**

| <b>Stage of AKI</b> | <b>Serum Creatinine</b>           |
|---------------------|-----------------------------------|
| Stage 1             | 1.5-1.9x baseline                 |
| Stage 2             | 2-2.9x baseline                   |
| Stage 3             | ≥3x baseline OR initiation of RRT |

Abbreviations: RRT, renal replacement therapy. Data on urine output were not available and were therefore not considered as part of AKI staging. Based on the KDIGO criteria.<sup>1</sup>

**Table S4: Characteristics of Biopsied versus Non-Biopsied Patients with ICPI-AKI**

| Variable                                                   | Biopsied (n=151) | Non-biopsied (n=278) | P Value |
|------------------------------------------------------------|------------------|----------------------|---------|
| Age at ICPI initiation, yrs, median (IQR)                  | 65 (58-73)       | 69 (60-75)           | 0.05    |
| Male, n (%)                                                | 85 (56.3)        | 181 (65.1)           | 0.08    |
| Race, n (%)                                                |                  |                      | 0.08    |
| White                                                      | 132 (87.4)       | 219 (78.8)           |         |
| Black                                                      | 9 (6.0)          | 18 (6.5)             |         |
| Asian                                                      | 5 (3.3)          | 16 (5.8)             |         |
| Other/Unknown                                              | 5 (3.3)          | 25 (9.0)             |         |
| Comorbidities, n (%)                                       |                  |                      |         |
| Hypertension                                               | 77 (60.0)        | 174 (62.6)           | 0.02    |
| Diabetes                                                   | 28 (18.5)        | 49 (17.6)            | 0.90    |
| CHF                                                        | 6 (4.0)          | 11 (4.0)             | 0.99    |
| COPD                                                       | 16 (10.6)        | 29 (10.4)            | 0.99    |
| Cirrhosis                                                  | 2 (1.3)          | 9 (3.2)              | 0.34    |
| Body mass index, median (IQR)                              | 25.6 (21.9-29.4) | 26.4 (23.2-30.6)     | 0.08    |
| Baseline SCr (mg/dL)                                       | 0.9 (0.76-1.16)  | 1.0 (0.8-1.26)       | 0.04    |
| Baseline eGFR, <sup>1</sup> ml/min per 1.73 m <sup>2</sup> |                  |                      |         |
| Median (IQR)                                               | 76.5 (59.7-92.1) | 71.5 (55.7-89.6)     | 0.06    |
| eGFR Categories, n (%)                                     |                  |                      | 0.15    |
| ≥90                                                        | 47 (31.1)        | 64 (23.0)            |         |
| 60-89                                                      | 65 (43.1)        | 127 (45.7)           |         |
| 45-59                                                      | 27 (17.9)        | 45 (16.2)            |         |
| 30-44                                                      | 10 (6.6)         | 33 (11.9)            |         |
| <30                                                        | 2 (1.3)          | 9 (3.2)              | 0.27    |
| Autoimmune Disease, n (%)                                  | 20 (13.2)        | 27 (9.7)             | 0.26    |
| Extrarenal irAE, <sup>2</sup> n (%)                        | 56 (37.1)        | 145 (52.2)           | 0.003   |
| Malignancy, n (%)                                          |                  |                      | 0.21    |
| Melanoma                                                   | 36 (23.8)        | 68 (24.5)            |         |
| Lung                                                       | 49 (32.5)        | 77 (27.7)            |         |
| Genitourinary                                              | 27 (17.9)        | 73 (26.3)            |         |
| Other                                                      | 39 (25.8)        | 60 (21.6)            |         |
| PPI, <sup>3</sup> n (%)                                    | 82 (39.4)        | 69 (31.2)            | 0.09    |
| Concomitant nephrotoxic chemotherapy, <sup>4</sup> n (%)   |                  |                      |         |
| Cisplatin                                                  | 4 (2.7)          | 3 (1.1)              | 0.25    |
| VEGF/TKI                                                   | 3 (2.0)          | 20 (65.0)            | 0.02    |
| ICPI, <sup>5</sup> n (%)                                   |                  |                      |         |
| Anti-CTLA-4                                                | 34 (22.5)        | 69 (24.8)            | 0.64    |
| Anti-PD-1                                                  | 120 (79.5)       | 227 (81.7)           | 0.58    |
| Anti-PD-L1                                                 | 14 (9.3)         | 28 (10.1)            | 0.87    |
| Combo anti-CTLA-4 + anti-PD-1/ PD-L1                       | 34 (22.5)        | 65 (23.4)            | 0.90    |
| Initial ICPI-AKI episode by stage, <sup>5</sup> n (%)      |                  |                      | <0.001  |
| Stage 1                                                    | 18 (11.9)        | 59 (21.2)            |         |
| Stage 2                                                    | 40 (26.5)        | 104 (37.4)           |         |
| Stage 3                                                    | 93 (61.6)        | 115 (41.4)           |         |
| Nephrologist involved, n (%)                               | 147 (97.4)       | 214 (77.0)           | <0.001  |

Data are shown as median (IQR) and n (%). Abbreviations: CHF, congestive heart failure; Combo, combination therapy; COPD, chronic obstructive pulmonary disease; CTLA-4, cytotoxic T lymphocyte-associated antigen 4; eGFR, estimated glomerular filtration rate; ICPI, immune checkpoint inhibitor; IQR, interquartile range; irAE, immune-related adverse event; PD-1, programmed cell death 1; PD-L1, programmed death-ligand 1; PPI, proton pump inhibitor; SCr, serum creatinine; TKI, tyrosine kinase inhibitor; VEGF, vascular endothelial growth factor.

<sup>1</sup>Baseline eGFR calculated based on Chronic Kidney Disease-Epidemiology Collaboration equation.<sup>2</sup>

<sup>2</sup>Extrarenal irAEs were assessed prior to (>14 days) or concomitant (within 14 days before or after) with ICPI-AKI diagnosis

<sup>3</sup>PPIs were assessed in the 14 days preceding ICPI-AKI.

<sup>4</sup>Concomitant chemotherapies were assessed in the 30 days preceding ICPI-AKI.

<sup>5</sup>AKI stages are defined by Kidney Disease: Improving Global Outcomes criteria.<sup>1</sup>

Data on body mass index are missing in 1 patient. All other data are complete.

**Table S5: Clinical Features of Patients Receiving Non-Corticosteroid Immunosuppression (n=22)**

| Age/<br>Sex | Cancer Type   | ICPi Regimen | Biopsy Findings                        | Alternative<br>Immuno-<br>suppression | Renal<br>Recovery <sup>1</sup> | Re-<br>challenge<br>with ICPi | Recurrent<br>ICPi-AKI after<br>Rechallenge | Survival Status<br>at Last Follow-<br>up | Days from ICPi-<br>AKI to Last<br>Follow-up or<br>Death |
|-------------|---------------|--------------|----------------------------------------|---------------------------------------|--------------------------------|-------------------------------|--------------------------------------------|------------------------------------------|---------------------------------------------------------|
| 72M         | Melanoma      | Ipi/Nivo     |                                        | Infliximab                            | Yes                            | No                            | --                                         | Alive                                    | 152                                                     |
| 73M         | Colon         | PD-L1        |                                        | Tocilizumab                           | Yes                            | No                            | --                                         | Alive                                    | 524                                                     |
| 69M         | Melanoma      | Ipi/Nivo     |                                        | MMF                                   | Yes                            | Yes                           | Yes                                        | Alive                                    | 347                                                     |
| 50F         | Melanoma      | CTLA-4/PD-1  |                                        | MMF                                   | Yes                            | No                            | --                                         | Alive                                    | 584                                                     |
| 72M         | Melanoma      | Ipi/Nivo     |                                        | Infliximab                            | Yes                            | Yes                           | Yes                                        | Deceased                                 | 200                                                     |
| 33F         | Melanoma      | Ipi          |                                        | Infliximab                            | Yes                            | No                            | --                                         | Alive                                    | 1191                                                    |
| 56F         | Lung Adeno    | Pembro       | ATIN                                   | MMF                                   | No                             | No                            | --                                         | Alive                                    | 119                                                     |
| 66M         | HCC           | Atezo        |                                        | MMF                                   | Yes                            | No                            | --                                         | Deceased                                 | 53                                                      |
| 46M         | Lung Adeno    | Pembro       | ATIN                                   | Infliximab                            | No                             | No                            | --                                         | Alive                                    | 283                                                     |
| 60M         | Lung Adeno    | Pembro       | ATIN                                   | MMF                                   | No                             | No                            | --                                         | Alive                                    | 688                                                     |
| 76M         | Lung Adeno    | Pembro       |                                        | MMF                                   | No                             | No                            | --                                         | Deceased                                 | 141                                                     |
| 71F         | Gastric Adeno | Pembro       | Membranous with<br>lupus-like features | IVIg                                  | No                             | Yes                           | Yes                                        | Deceased                                 | 38                                                      |
| 51M         | HCC           | Nivo         | ATIN, chronic TMA,<br>IC-mediated GN   | Infliximab                            | No                             | Yes                           | Yes                                        | Alive                                    | 1014                                                    |
| 60M         | RCC           | Ipi/Nivo     |                                        | MMF                                   | No                             | No                            | --                                         | Deceased                                 | 17                                                      |
| 68F         | Lung SCC      | Atezo        |                                        | MMF                                   | No                             | No                            | --                                         | Deceased                                 | 7                                                       |
| 66M         | RCC           | Ipi/Nivo     |                                        | MMF                                   | Yes                            | No                            | --                                         | Alive                                    | 132                                                     |
| 68M         | Melanoma      | Ipi/Nivo     | ATIN                                   | MMF                                   | Yes                            | No                            | --                                         | Deceased                                 | 69                                                      |
| 63M         | Sarcoma       | Ipi/Nivo     | ATIN, IgA<br>Nephropathy               | MMF                                   | No                             | No                            | --                                         | Deceased                                 | 108                                                     |
| 57F         | Melanoma      | Ipi/Nivo     | Pauci-immune GN                        | PLEX, Rituximab                       | No                             | No                            | --                                         | Alive                                    | 297                                                     |
| 52F         | Lung Adeno    | Durva        | Pauci-immune GN                        | Rituximab                             | No                             | No                            | --                                         | Alive                                    | 150                                                     |
| 81M         | Melanoma      | Nivo         | AA Amyloidosis                         | Colchicine                            | No                             | No                            | --                                         | Deceased                                 | 130                                                     |
| 42M         | Rectal        | Pembro       | AA Amyloidosis                         | Tocilizumab                           | No                             | No                            | --                                         | Alive                                    | 555                                                     |

Abbreviations: Adeno, adenocarcinoma; Atezo, atezolizumab; ATIN, acute tubulointerstitial nephritis; Durva, durvalumab; F, female; GBM, glioblastoma multiforme; GN, glomerulonephritis; HCC, hepatocellular carcinoma; IC, immune complex; ICPi-AKI, immune checkpoint inhibitor-associated acute kidney injury; Ipi, Ipilimumab; IVIG, intravenous immunoglobulin; M, male; MMF, mycophenolate mofetil; Nivo, Nivolumab; Pembro, Pembrolizumab; PLEX, plasmapheresis; RCC, renal cell carcinoma; RCT, randomized clinical trial; SCC, small cell cancer; TMA, thrombotic microangiopathy.

<sup>1</sup>Renal recovery is defined as return of SCr ≤50% of baseline within 90 days of ICPi-AKI.

**Table S6: Characteristics of ICPI-AKI Patients with and without Renal Recovery**

| Characteristic                                                        | All patients (n=429) | Renal Recovery |                | P Value |
|-----------------------------------------------------------------------|----------------------|----------------|----------------|---------|
|                                                                       |                      | Yes (n=276)    | No (n=153)     |         |
| Age (yrs), median (IQR)                                               | 68 (59-75)           | 69 (60-75)     | 65 (58-74)     | 0.14    |
| Sex, n (%)                                                            |                      |                |                |         |
| Male                                                                  | 266/429 (62.0)       | 185/266 (69.6) | 81/266 (30.5)  | 0.005   |
| Female                                                                | 163/429 (38.0)       | 91/163 (55.8)  | 72/163 (44.2)  |         |
| Race, n (%)                                                           |                      |                |                | 0.04    |
| White                                                                 | 351/429 (81.8)       | 234/351 (66.7) | 117/351 (33.3) |         |
| Non-White                                                             | 78/429 (18.2)        | 42/78 (53.9)   | 36/78 (46.2)   |         |
| Hypertension, n (%)                                                   |                      |                |                | 0.36    |
| Yes                                                                   | 251/429 (58.5)       | 166/251 (66.1) | 85/251 (33.9)  |         |
| No                                                                    | 178/429 (41.5)       | 110/178 (61.8) | 68/178 (38.2)  |         |
| Diabetes, n (%)                                                       |                      |                |                | 0.43    |
| Yes                                                                   | 77/429 (17.9)        | 53/77 (68.8)   | 24/77 (31.2)   |         |
| No                                                                    | 352/429 (82.1)       | 223/352 (63.4) | 129/352 (36.7) |         |
| Baseline eGFR <sup>1</sup> (ml/min/1.73m <sup>2</sup> )               |                      |                |                |         |
| Median (IQR)                                                          | 73 (57-90)           | 68 (53-85)     | 86 (65-98)     | <0.001  |
| eGFR categories                                                       |                      |                |                | <0.001  |
| ≥90                                                                   | 111/429 (25.9)       | 49/111 (44.1)  | 62/111 (55.9)  |         |
| 60-89                                                                 | 192/429 (44.8)       | 128/192 (66.7) | 64/192 (33.3)  |         |
| 45-59                                                                 | 72/429 (16.8)        | 56/72 (76.4)   | 17/72 (23.6)   |         |
| <45                                                                   | 54/429 (12.6)        | 44/54 (81.5)   | 10/54 (18.5)   |         |
| Malignancy, n (%)                                                     |                      |                |                | <0.001  |
| Lung                                                                  | 126/429 (29.4)       | 62/126 (49.2)  | 64/126 (50.8)  |         |
| Other                                                                 | 303/429 (70.6)       | 214/303 (70.6) | 89/303 (29.4)  |         |
| PPI, <sup>2</sup> n (%)                                               |                      |                |                | 0.23    |
| Yes                                                                   | 208/429 (48.5)       | 140/208 (67.3) | 68/208 (32.7)  |         |
| No                                                                    | 221/429 (51.5)       | 136/221 (61.5) | 85/221 (38.5)  |         |
| NSAIDs, <sup>2</sup> n (%)                                            |                      |                |                | 0.37    |
| Yes                                                                   | 81/429 (18.9)        | 56/81 (69.1)   | 25/81 (30.9)   |         |
| No                                                                    | 348/429 (81.1)       | 220/348 (63.2) | 128/348 (36.8) |         |
| Antibiotics, <sup>2</sup> n (%)                                       |                      |                |                | 0.49    |
| Yes                                                                   | 40/429 (9.3)         | 28/40 (70.0)   | 12/40 (30.0)   |         |
| No                                                                    | 389/429 (90.7)       | 248/389 (63.8) | 141/389 (36.3) |         |
| Receipt of PPI, NSAIDs, or Antibiotics, n (%)                         |                      |                |                | 0.05    |
| Yes                                                                   | 266/429 (62.0)       | 181/266 (68.1) | 85/266 (32.0)  |         |
| No                                                                    | 163/429 (38.0)       | 95/163 (58.3)  | 68/163 (41.7)  |         |
| Receipt of concomitant nephrotoxic chemotherapies, <sup>3</sup> n (%) |                      |                |                | 0.34    |
| Yes                                                                   | 71/429 (16.6)        | 42/71 (59.2)   | 29/71 (40.8)   |         |
| No                                                                    | 358/429 (83.4)       | 234/358 (65.4) | 124/358 (34.6) |         |
| Combination ICPI therapy, <sup>4</sup> n (%)                          |                      |                |                | 0.03    |
| Yes                                                                   | 99/429 (23.1)        | 73/99 (73.7)   | 26/99 (26.3)   |         |
| No                                                                    | 330/429 (76.9)       | 203/330 (61.5) | 127/330 (38.5) |         |
| Extrarenal irAE, <sup>5</sup> n (%)                                   |                      |                |                | 0.09    |
| Yes                                                                   | 201/429 (46.9)       | 138/201 (68.7) | 63/201 (31.3)  |         |
| No                                                                    | 228/429 (53.2)       | 138/228 (60.5) | 90/228 (39.5)  |         |
| Concomitant extra-renal irAE, n (%)                                   |                      |                |                | 0.03    |
| Yes                                                                   | 114/429 (26.6)       | 83/114 (72.8)  | 31/114 (27.2)  |         |
| No                                                                    | 315/429 (73.4)       | 193/215 (61.3) | 122/215 (38.7) |         |
| Days from ICPI initiation to AKI, n (%)                               |                      |                |                | 0.22    |
| <30                                                                   | 55/429 (12.8)        | 36/55 (65.5)   | 19/55 (34.6)   |         |
| 30-59                                                                 | 56/429 (13.1)        | 39/56 (69.6)   | 17/56 (30.4)   |         |
| 60-89                                                                 | 64/429 (14.9)        | 47/64 (73.4)   | 17/64 (26.6)   |         |
| ≥90                                                                   | 254/429 (59.2)       | 154/254 (60.6) | 100/254 (39.4) |         |
| ICPI-AKI stage, <sup>6</sup> n (%)                                    |                      |                |                | <0.001  |
| Stage 1                                                               | 77/429 (17.9)        | 70/77 (90.1)   | 7/77 (9.1)     |         |
| Stage 2                                                               | 144/429 (33.6)       | 102/144 (70.8) | 42/144 (29.2)  |         |
| Stage 3                                                               | 208/429 (48.5)       | 104/208 (50.0) | 104/208 (50.0) |         |
| Blood on urinalysis, <sup>7</sup> n (%)                               |                      |                |                | <0.001  |
| <2+                                                                   | 257/317 (81.1)       | 175/257 (68.1) | 82/257 (31.9)  |         |
| ≥2+                                                                   | 60/317 (18.9)        | 27/60 (45.0)   | 33/60 (55.0)   |         |
| Leukocyte esterase on urinalysis, <sup>7</sup> n (%)                  |                      |                |                | <0.001  |
| <2+                                                                   | 238/317 (75.1)       | 165/238 (69.3) | 73/238 (30.7)  |         |
| ≥2+                                                                   | 79/317 (24.9)        | 37/79 (46.8)   | 42/79 (53.2)   |         |
| Urine protein:creatinine, g/g, n (%)                                  |                      |                |                | 0.01    |
| <1                                                                    | 162/206 (78.6)       | 108/162 (66.7) | 54/162 (33.3)  |         |
| ≥1                                                                    | 44/206 (21.4)        | 19/44 (43.2)   | 25/55 (56.8)   |         |



|                                                                            |                |                |                |        |
|----------------------------------------------------------------------------|----------------|----------------|----------------|--------|
| Eosinophilia, cells per $\mu$ l, n (%)                                     |                |                |                | 0.60   |
| <500                                                                       | 387/426 (90.8) | 248/387 (64.1) | 139/387 (35.9) |        |
| $\geq$ 500                                                                 | 39/426 (9.2)   | 27/39 (69.2)   | 12/39 (30.8)   |        |
| Nephrologist involved in treatment of AKI, n (%)                           |                |                |                | 0.89   |
| Yes                                                                        | 361/429 (84.1) | 233/361 (64.5) | 128/361 (35.5) |        |
| No                                                                         | 68/429 (15.9)  | 43/68 (63.2)   | 25/48 (36.8)   |        |
| Treatment with CS, n (%)                                                   |                |                |                | 0.09   |
| Yes                                                                        | 350/429 (81.6) | 232/350 (66.3) | 118/230 (3.37) |        |
| No                                                                         | 79/429 (18.4)  | 44/79 (55.7)   | 35/79 (44.3)   |        |
| Treatment with CS within 3d of AKI, n (%)                                  |                |                |                | 0.01   |
| Yes                                                                        | 160/347 (46.1) | 117/160 (73.1) | 43/160 (26.9)  |        |
| No                                                                         | 187/347 (53.9) | 112/187 (60.0) | 75/187 (40.1)  |        |
| SCr at CS initiation (mg/dL), median (IQR)                                 | 2.5 (2.0-3.7)  | 2.4 (2.0-3.6)  | 2.0 (1.5-2.6)  | 0.90   |
| Received IV pulse CS, n (%)                                                |                |                |                | 0.01   |
| Yes                                                                        | 100/350 (28.6) | 56/100 (56.0)  | 44/100 (44.0)  |        |
| No                                                                         | 250/350 (71.4) | 176/250 (70.4) | 74/250 (29.6)  |        |
| Initial daily oral CS dose (prednisone equivalent units, mg), median (IQR) | 60 (50-80)     | 60 (60-80)     | 60 (40-65)     | 0.12   |
| Nadir SCr after treatment <sup>8</sup> (mg/dL), median (IQR)               | 1.3 (1.1-1.7)  | 1.2 (1.0-1.5)  | 1.6 (1.3-2.1)  | <0.001 |

Abbreviations: AKI, acute kidney injury; BRAF, v-raf murine sarcoma viral oncogene homolog B1; CTLA-4, cytotoxic T lymphocyte-associated antigen 4; combo, combination therapy; CS, corticosteroid; eGFR, estimated glomerular filtration rate; irAEs, immune-related adverse events; ICPI, immune checkpoint inhibitor; IV, intravenous; NSAID, non-steroidal anti-inflammatory drug; PD-1, programmed cell death 1; PD-L1, programmed death-ligand 1; PPI, proton pump inhibitor; RRT, renal replacement therapy; SCr, serum creatinine.

<sup>1</sup>Baseline eGFR calculated based on Chronic Kidney Disease-Epidemiology Collaboration equation.<sup>2</sup>

<sup>2</sup>PPIs, NSAIDs, and antibiotics were assessed in the 14 days preceding AKI.

<sup>3</sup>Refers to treatment with nephrotoxic chemotherapies in the 30 days preceding AKI, including cisplatin, carboplatin, tyrosine kinase and/or vascular endothelial growth factor inhibitors, pemetrexed, BRAF inhibitors, and paclitaxel

<sup>4</sup>Denotes whether the patient ever received combination therapy prior to AKI.

<sup>5</sup>Extrarenal irAEs were assessed prior to (>14 days) or concomitant (within 14 days before or after) with ICPI-AKI.

<sup>6</sup>AKI stages are defined by Kidney Disease: Improving Global Outcomes criteria.<sup>1</sup>

<sup>7</sup>From initial dipstick at the time of AKI diagnosis.

<sup>8</sup>Within 3 months of AKI diagnosis.

112 patients (26.1%) were missing data on blood and leukocyte esterase on urine dipstick, 223 (52.0%) were missing data on urine protein:Cr ratio, 3 (0.7%) were missing data on eosinophils, and 3 (0.7%) were missing data on the timing of corticosteroid treatment. All other data are complete.

**Table S7: Characteristics of Patients Rechallenged Versus Not Rechallenged after ICPI-AKI**

| Variable                                                                  | All<br>(n=429)   | Rechallenged<br>(n=121) | Not Rechallenged<br>(n=308) | P Value |
|---------------------------------------------------------------------------|------------------|-------------------------|-----------------------------|---------|
| Age at ICPI initiation, yrs, median (IQR)                                 | 68 (59-75)       | 66 (60-74)              | 68 (59-75)                  | 0.62    |
| Male, n (%)                                                               | 266 (62.0)       | 81 (66.9)               | 185 (60.1)                  | 0.22    |
| Race, n (%)                                                               |                  |                         |                             | 0.21    |
| White                                                                     | 351 (81.8)       | 104 (86.0)              | 247 (80.2)                  |         |
| Nonwhite                                                                  | 78 (18.2)        | 17 (14.1)               | 61 (19.8)                   |         |
| Malignancy, n (%)                                                         |                  |                         |                             | 0.06    |
| Lung                                                                      | 126 (29.4)       | 27 (22.3)               | 99 (32.1)                   |         |
| Melanoma                                                                  | 104 (24.2)       | 39 (32.2)               | 65 (21.1)                   |         |
| Genitourinary                                                             | 100 (23.3)       | 28 (23.1)               | 72 (23.4)                   |         |
| Other                                                                     | 99 (23.1)        | 27 (22.3)               | 72 (23.4)                   |         |
| Baseline eGFR, <sup>1</sup> ml/min per 1.73 m <sup>2</sup> , median (IQR) | 73.3 (57.1-90.4) | 73.3 (60.7-88.1)        | 73.6 (55.4-91.5)            | 0.97    |
| Autoimmune disease, n (%)                                                 | 47 (11.0)        | 13 (10.7)               | 34 (11.0)                   | 0.99    |
| Extrarenal irAE, <sup>2</sup> n (%)                                       | 201 (46.9)       | 58 (47.9)               | 143 (46.4)                  | 0.83    |
| Initial ICPI-AKI episode by stage, <sup>3</sup> n (%)                     |                  |                         |                             | 0.002   |
| AKI stage 1                                                               | 77 (18.0)        | 27 (22.3)               | 50 (16.2)                   |         |
| AKI stage 2                                                               | 144 (33.6)       | 52 (43.0)               | 92 (30.0)                   |         |
| AKI stage 3                                                               | 208 (48.5)       | 42 (34.7)               | 166 (53.9)                  |         |
| RRT, n (%)                                                                | 33 (7.7)         | 3 (2.5)                 | 30 (9.7)                    | 0.001   |
| Rechallenged with same initial class of ICPI, n (%)                       | ---              | 98 (81.0)               | ---                         |         |
| Rechallenged with a different class of ICPI, n (%)                        | ---              | 23 (19.0)               | ---                         |         |
| Treated with corticosteroids, n (%)                                       | 350 (81.6)       | 96 (79.3)               | 254 (82.5)                  | 0.50    |
| Biopsied, n (%)                                                           | 151 (35.2)       | 34 (28.1)               | 117 (38.0)                  | 0.06    |
| ATIN on Biopsy, n (%)                                                     | 125 (82.8)       | 26 (76.5)               | 99 (84.6)                   | 0.30    |
| Nadir SCr, <sup>4</sup> mg/dl, median (IQR)                               | 1.3 (1.1-1.7)    | 1.2 (1.0-1.5)           | 1.4 (1.1-1.8)               | 0.001   |
| Renal recovery, <sup>5</sup> n (%)                                        | 276 (64.3)       | 93 (76.8)               | 183 (59.4)                  | <0.001  |

Abbreviations: AKI, acute kidney injury; ATIN, acute tubulointerstitial nephritis; ICPI, immune checkpoint inhibitor; RRT, renal replacement therapy; SCr, serum creatinine.

<sup>1</sup>Baseline eGFR calculated based on Chronic Kidney Disease-Epidemiology Collaboration equation.<sup>2</sup>

<sup>2</sup>Extrarenal irAEs were assessed prior to (>14 days) or concomitant (within 14 days before or after) with ICPI-AKI.

<sup>3</sup>AKI stages are defined by Kidney Disease: Improving Global Outcomes criteria.<sup>1</sup>

<sup>4</sup>Lowest SCr in the 90 days following ICPI-AKI onset.

<sup>5</sup>Defined as a return of SCr to ≤50% of the baseline SCr within 90 days of ICPI-AKI.

**Table S8: Characteristics of Patients with and without Recurrent ICPI-AKI after Rechallenge**

| Variable                                                  | All Rechallenged (n=121) | Recurrent ICPI-AKI (n=20) | No Recurrent ICPI-AKI (n=101) | P Value |
|-----------------------------------------------------------|--------------------------|---------------------------|-------------------------------|---------|
| Days, initial ICPI-AKI to rechallenge, median (IQR)       | 56 (33-121)              | 58 (37-105)               | 56 (33-122)                   | 0.86    |
| Renal Recovery from initial ICPI-AKI, <sup>1</sup> n (%)  | 93 (76.9)                | 15 (75.0)                 | 78 (77.2)                     | 0.78    |
| SCr at rechallenge (mg/dL), median (IQR)                  | 1.3 (1.1-1.5)            | 1.3 (1.1-1.6)             | 1.3 (1.1-1.5)                 | 0.46    |
| On CS at rechallenge, n (%)                               | 59 (48.8)                | 11 (55.0)                 | 48 (47.5)                     | 0.63    |
| Prednisone dose (mg/day), median (IQR)                    | 10 (20-53)               | 10 (8-30)                 | 10 (8-20)                     | 0.76    |
| Rechallenge Regimen, n (%)                                |                          |                           |                               | 0.99    |
| CTLA-4                                                    | 17 (14.0)                | 3 (14.3)                  | 14 (13.9)                     |         |
| PD-1                                                      | 89 (73.6)                | 15 (71.4)                 | 74 (73.3)                     |         |
| PD-L1                                                     | 10 (8.3)                 | 1 (4.8)                   | 9 (8.9)                       |         |
| Rechallenged with same initial class of ICPI, n (%)       | 98 (81.0)                | 14 (70.0)                 | 84 (83.2)                     | 0.34    |
| Rechallenged with a different class of ICPI, n (%)        | 23 (19.0)                | 6 (30.0)                  | 17 (16.8)                     |         |
| Age at ICPI initiation (yrs), median (IQR)                | 67 (61-73)               | 67 (62-72)                | 66 (60-74)                    | 0.92    |
| Female, n (%)                                             | 81 (66.9)                | 14 (70.0)                 | 67 (66.3)                     | 0.99    |
| Autoimmune Disease, n (%)                                 | 13 (10.7)                | 1 (5.0)                   | 23 (11.9)                     | 0.69    |
| Extrarenal irAE, <sup>2</sup> n (%)                       | 58 (47.9)                | 11 (55.0)                 | 47 (46.5)                     | 0.63    |
| Stages of initial ICPI-AKI, <sup>3</sup> n (%)            |                          |                           |                               | 0.67    |
| Stage 1 AKI                                               | 27 (22.3)                | 6 (30.0)                  | 21 (20.8)                     |         |
| Stage 2 AKI                                               | 52 (43.0)                | 8 (40.0)                  | 44 (43.6)                     |         |
| Stage 3 AKI                                               | 42 (34.7)                | 6 (30.0)                  | 36 (35.6)                     |         |
| Biopsied, n (%)                                           | 34 (28.1)                | 7 (35.0)                  | 27 (26.7)                     | 0.59    |
| ATIN on biopsy, n (%)                                     | 26 (76.5)                | 3 (42.9)                  | 23 (85.2)                     | 0.04    |
| Died, n (%)                                               | 44 (36.4)                | 12 (60.0)                 | 32 (31.7)                     | 0.02    |
| Days from rechallenge to recurrent ICPI-AKI, median (IQR) | ---                      | 72.5 (20.5-120.5)         | ---                           | ---     |
| SCr at recurrent ICPI-AKI (mg/dL), median (IQR)           | ---                      | 1.0 (0.9-1.1)             | ---                           | ---     |
| Stages of recurrent ICPI-AKI, n (%)                       |                          |                           |                               |         |
| Stage 1 AKI                                               | ---                      | 4 (20)                    | ---                           | ---     |
| Stage 2 AKI                                               | ---                      | 8 (40)                    | ---                           | ---     |
| Stage 3 AKI <sup>4</sup>                                  | ---                      | 8 (40)                    | ---                           | ---     |
| ICPI held at time of AKI, n (%)                           | ---                      | 20 (100)                  | ---                           | ---     |
| ICPI-AKI treated with CS, n (%)                           | ---                      | 14 (70)                   | ---                           | ---     |
| Days from ICPI-AKI to CS, median (IQR)                    | ---                      | 5 (3-13)                  | ---                           | ---     |
| Received IV pulse CS, n (%)                               | ---                      | 1 (7.1)                   | ---                           | ---     |
| Initial daily oral CS dose (mg of prednisone)             | ---                      | 40 (40-60)                | ---                           | ---     |
| RRT at the time of CS, n (%)                              | ---                      | 0 (0)                     | ---                           | ---     |
| Received non-CS immuno-suppressant, <sup>5</sup> n (%)    | ---                      | 2 (10)                    | ---                           | ---     |
| Renal Recovery, <sup>6</sup> n (%)                        | ---                      | 10 (50)                   | ---                           | ---     |
| Days to Renal Recovery, median (IQR)                      | ---                      | 34 (27-38)                | ---                           | ---     |
| Nadir SCr (mg/dL), <sup>7</sup> median (IQR)              | ---                      | 1.4 (1.1-1.7)             | ---                           | ---     |

Data are shown as median (IQR) and n (%).

Abbreviations: AKI, acute kidney injury; ATIN, acute tubulointerstitial nephritis; CTLA-4, cytotoxic T lymphocyte-associated antigen 4; CS, corticosteroid; ICPI, immune checkpoint inhibitor; IV, intravenous; irAE, immune-related adverse event; PD-1, programmed cell death 1; PD-L1, programmed death-ligand 1; RRT, renal replacement therapy; SCr, serum creatinine.

<sup>1</sup>Defined as a return of SCr to  $\leq 50\%$  of the baseline SCr

<sup>2</sup>Extrarenal irAEs were assessed prior to (>14 days) or concomitant (within 14 days before or after) with ICPI-AKI.

<sup>3</sup>AKI stages are defined by Kidney Disease: Improving Global Outcomes criteria.<sup>1</sup>

<sup>4</sup>2 patients had AKI requiring RRT and were not liberated.

<sup>5</sup>One patient received Anakinra, and another received infliximab.

<sup>6</sup>Defined as a return of SCr to  $\leq 50\%$  of the baseline SCr within 90 days of ICPI-AKI.

<sup>7</sup>Lowest SCr in the 90 days following ICPI-AKI onset.

**Figure S1: Participating Sites in the ICPi-AKI Consortium**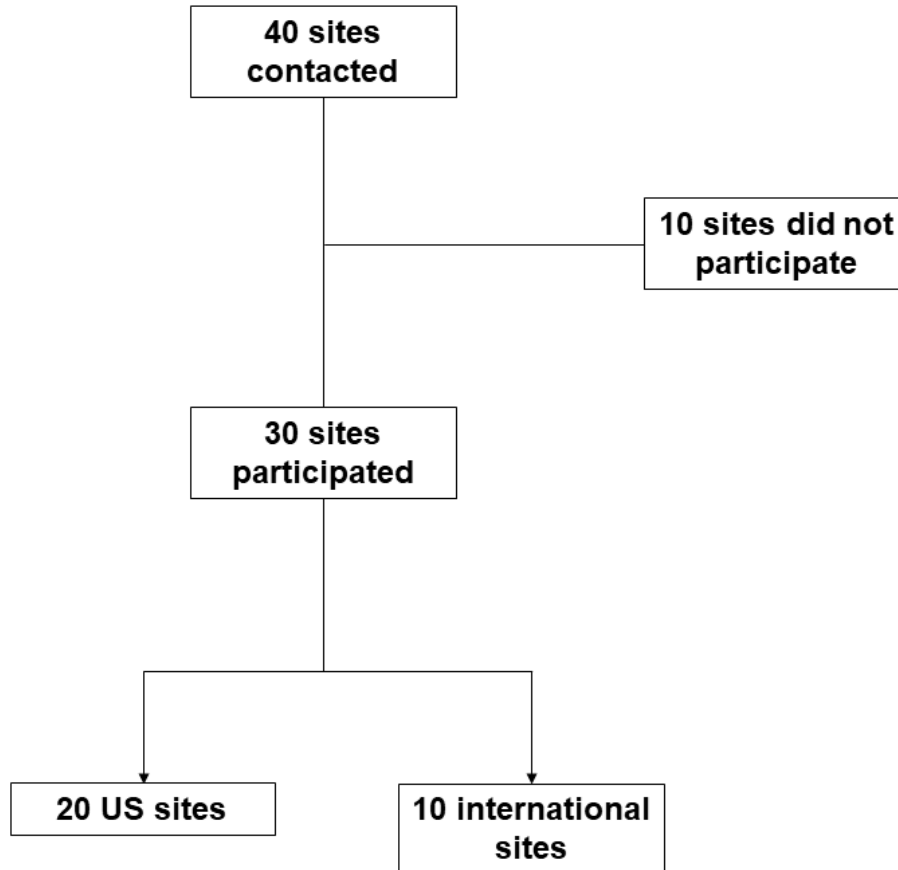

**Figure S2: ICPI Initiation by Year among Patients with and without ICPI-AKI**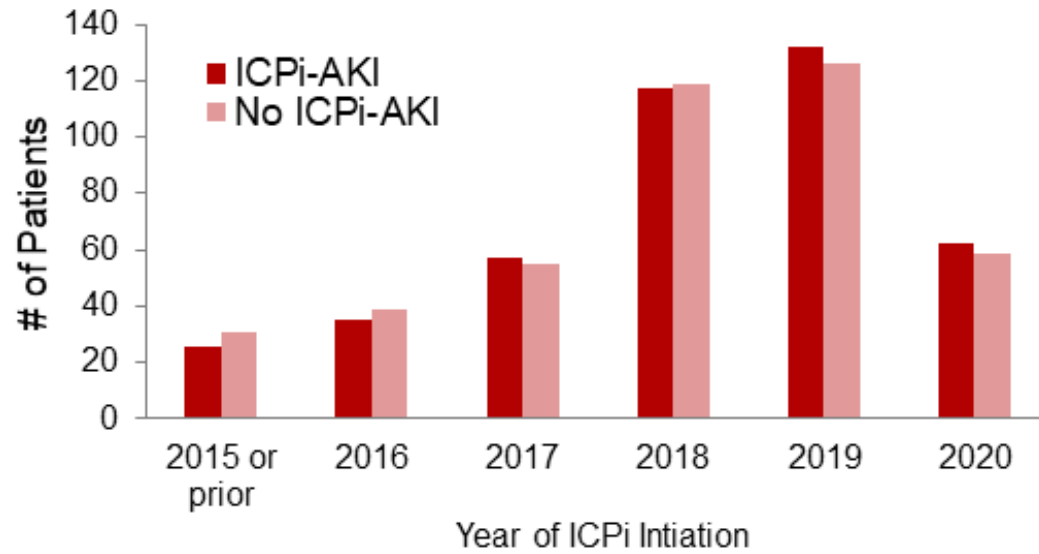

**Figure S3: Risk Factors for Stage 2 ICPI-AKI or Higher**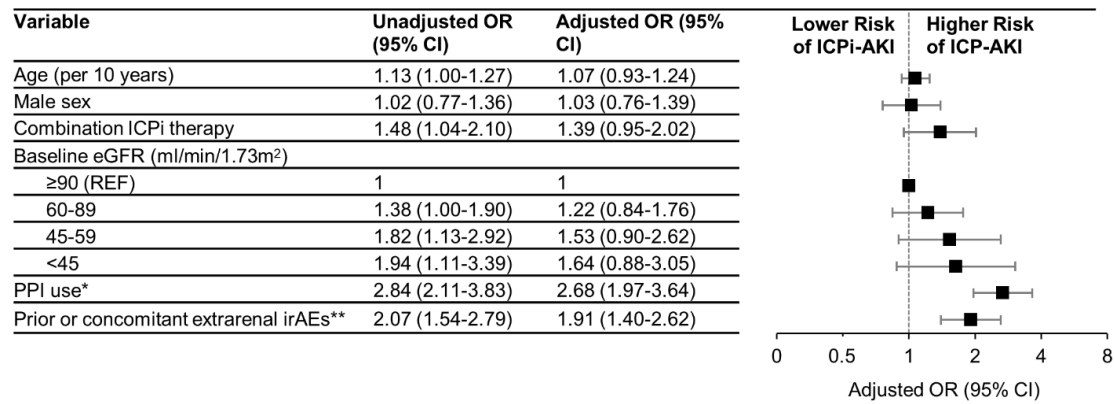

n=781 (352 patients with stage 2 or 3 ICPI-AKI; 429 patients without ICPI-AKI). All model covariates are shown in the figure.

\*Denotes PPI use within 14 days preceding ICPI-AKI among those with ICPI-AKI, and PPI use at the time of ICPI initiation among patients without ICPI-AKI.

\*\*Extrarenal irAEs were assessed prior to (>14 days) or concomitant (within 14 days before or after) with ICPI-AKI diagnosis among patients with ICPI-AKI, and at any time after ICPI initiation among patients without ICPI-AKI.

Abbreviations: eGFR, estimated glomerular filtration rate; ICPI, immune checkpoint inhibitor; irAEs, immune-related adverse events; PPI, proton pump inhibitor.

**Figure S4: Predictors of Renal Recovery among Patients Treated with Corticosteroids**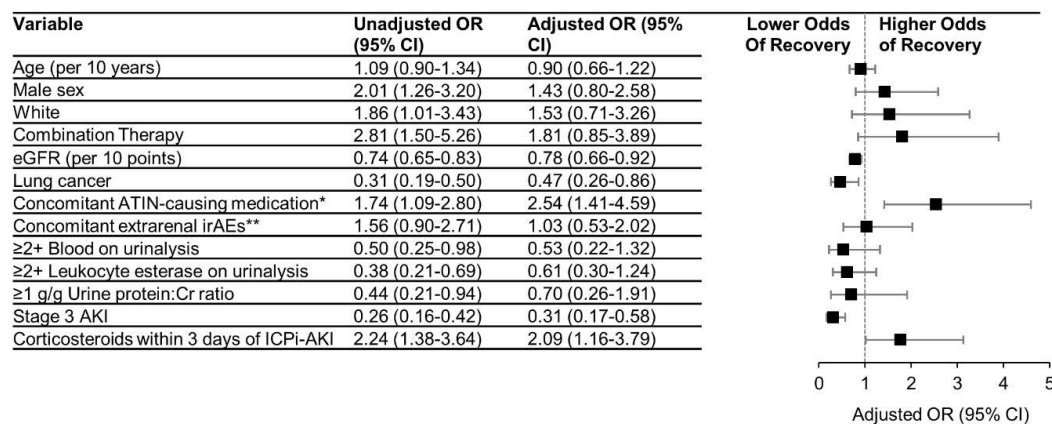

n=334 (including 227 patients with renal recovery). Renal recovery was defined as a return of serum creatinine to ≤50% of the baseline value within 90 days of ICPI-AKI. Patients who were died within 14 days of ICPI-AKI (n=16) were excluded. All model covariates are shown in the figure.

\*Denotes receipt of NSAIDs, PPIs, antibiotics in the 14 days preceding ICPI-AKI.

\*\*Extrarenal irAEs were assessed as occurring concomitantly (within 14 days before or after) with ICPI-AKI.

Abbreviations: AKI, acute kidney injury; ATIN, acute tubulointerstitial nephritis; Cr, creatinine; eGFR, estimated glomerular filtration rate; ICPI, immune checkpoint inhibitor; irAE, immune-related adverse events; NSAIDs, non-steroidal anti-inflammatory drugs; PPI, proton pump inhibitor.

Figure S5: Flowchart of Patients with ICPI-AKI

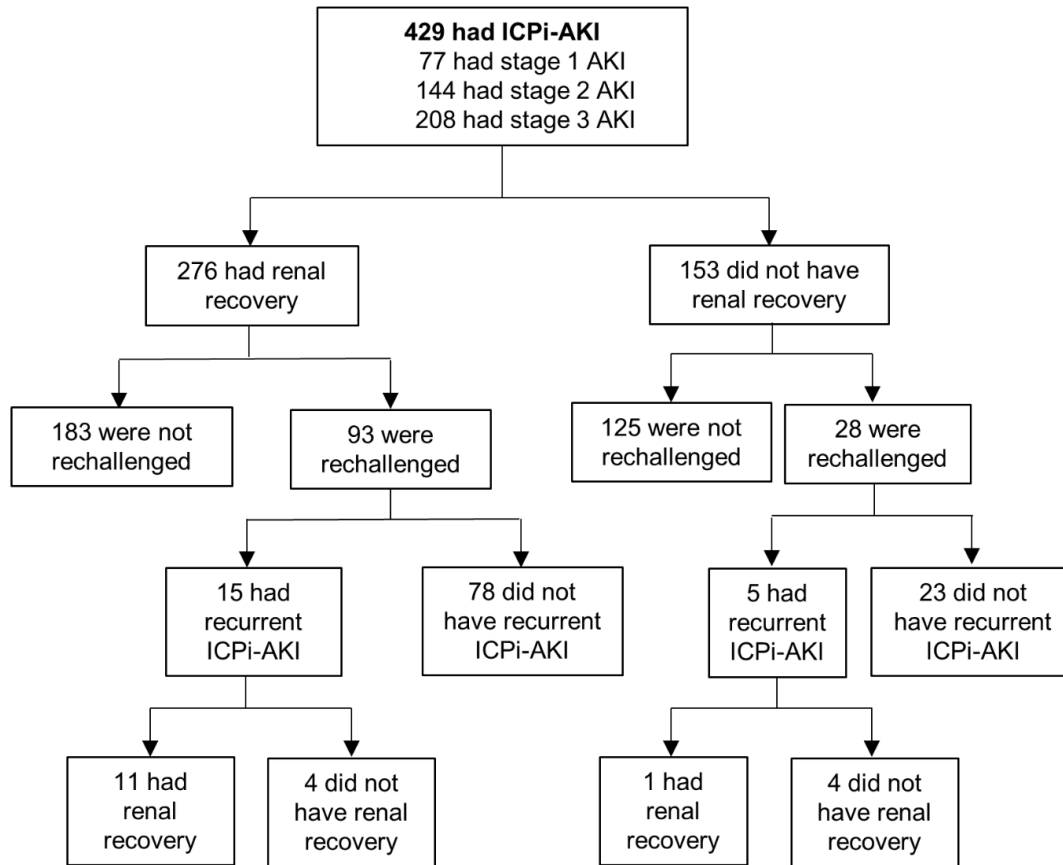

Stages of AKI are defined according to Kidney Disease: Improving Global Outcomes criteria.<sup>1</sup> Renal recovery is defined as a return of serum creatinine to  $\leq 50\%$  of the baseline value within 90 days of ICPI-AKI.



**Figure S6: Months from ICPI-AKI to Rechallenge**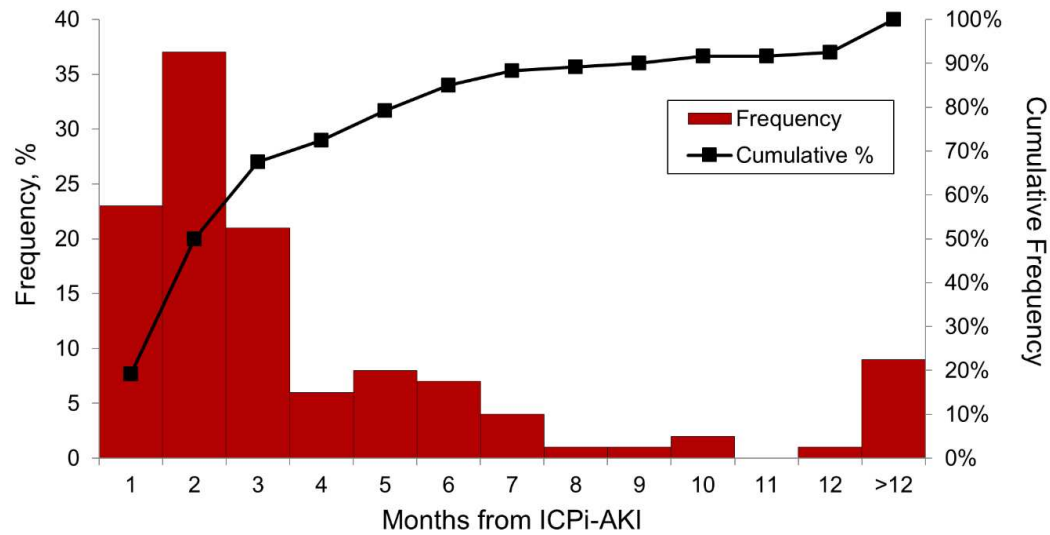

121 patients were rechallenged at a median of 1.8 months (IQR, 1.1-4.0) following ICPI-AKI

Figure S7: Survival Among Patients Rechallenged versus Not Rechallenged

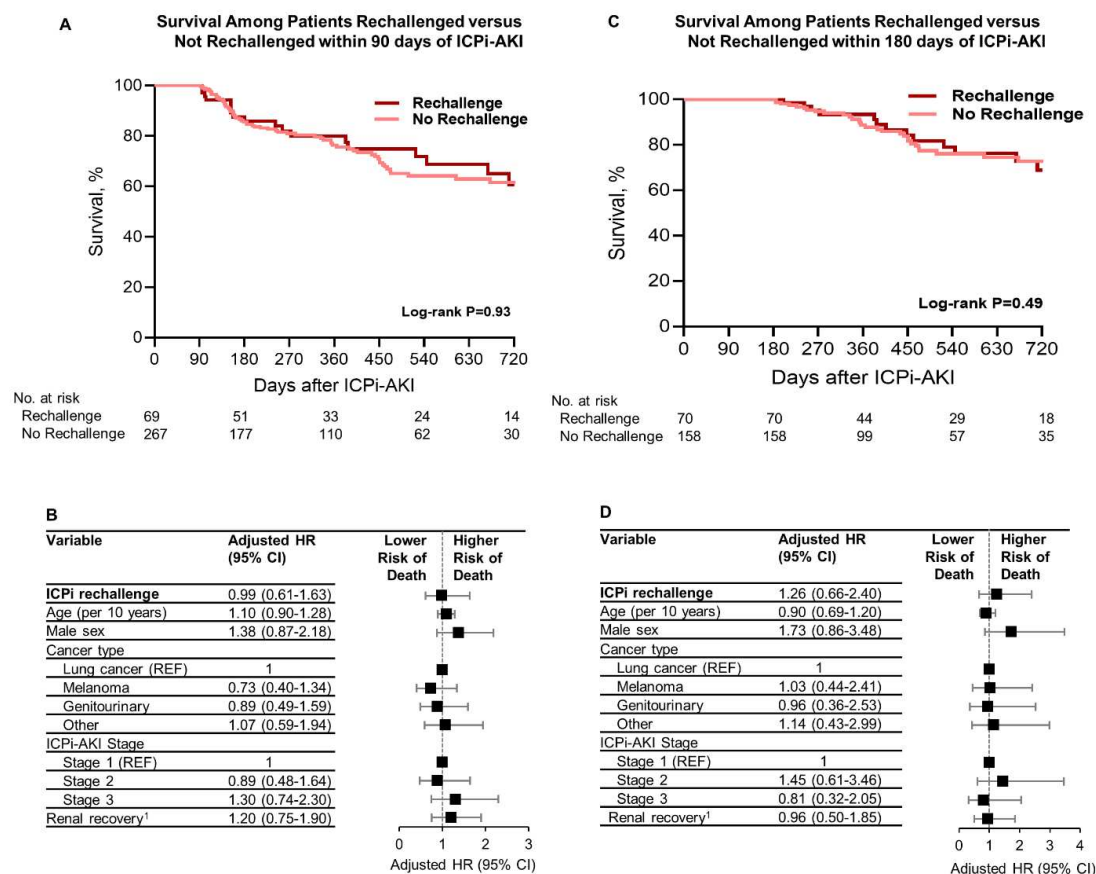

Kaplan-Meier curves and multivariable Cox regression models were used to estimate the effect of ICPI rechallenge versus no ICPI rechallenge on overall survival. To eliminate the potential for immortal time bias, we limited this analysis to patients who survived at least 90 days after the initial ICPI-AKI event, and we compared the survival of patients rechallenged in the first 90 days to those not rechallenged in the first 90 days (panels A and B). We repeated this analysis in patients who survived at least 180 days following the initial ICPI-AKI event, thereby comparing the survival of patients rechallenged in the first 180 days to those not rechallenged in the first 180 days (panels C and D).

<sup>1</sup>Renal recovery is defined as a return of serum creatinine to  $\leq 50\%$  of the baseline value within 90 days of ICPI-AKI. All model covariates are shown in the figure.

Abbreviations: HR, hazard ratio.

**Figure S8: Frequency and Severity of Recurrent ICPI-AKI after Rechallenge (n=121)**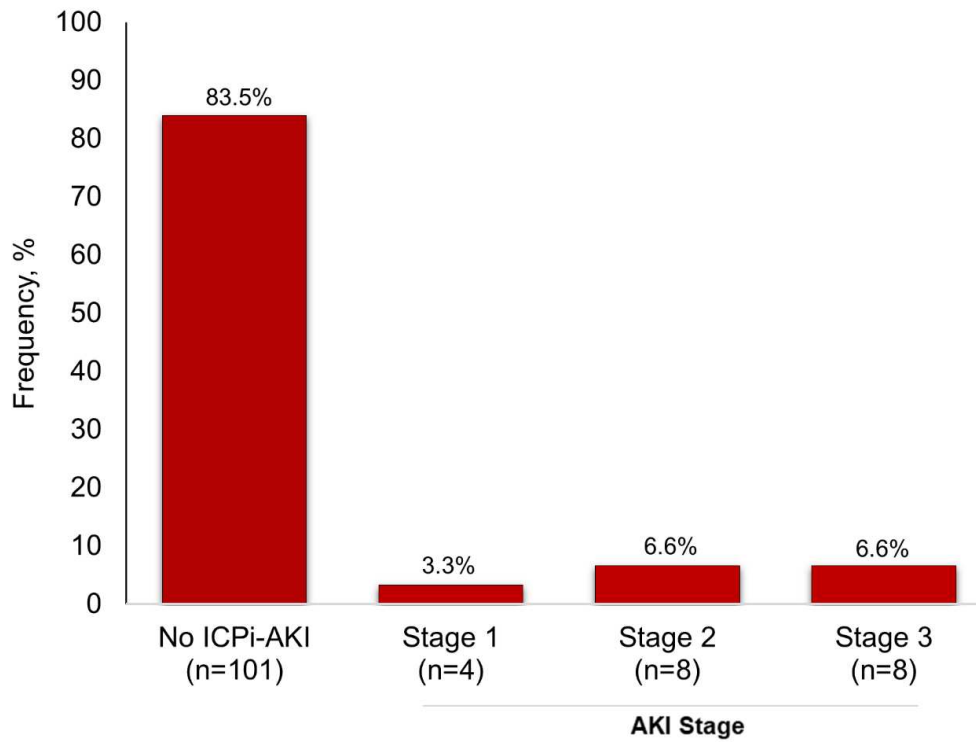

**Acknowledgements**

Of the 429 patients in this study, 24 (5.6%) were reported in a study of biomarkers and clinical features of ICPi-AKI;<sup>3</sup> 10 (2.3%) were reported in a study of AKI among patients receiving ICPis;<sup>4</sup> 1 (0.2%) was reported in a study of ICPi-AKI after PD-L1 inhibitors;<sup>5</sup> 21 (4.9%) were included in a study of patients describing rapid corticosteroid taper versus standard of care for ICPi-AKI;<sup>6</sup> 2 (0.5%) were reported in a study of AA amyloidosis attributed to ICPis;<sup>7</sup> 30 (7.0%) were reported in 3 publications describing patients with ICPi-AKI admitted to a hospital in Spain;<sup>8-10</sup> 3 (0.7%) were included in a study of ICPi-AKI patients with lesions other than acute tubulointerstitial nephritis on biopsy;<sup>11</sup> 7 (1.6%) with ICPi-AKI and 9 (2.1%) control patients without ICPi-AKI were included in 2 publications, neither of which assessed renal toxicities from ICPis;<sup>12,13</sup> and 2 (0.5%) were included in a study of ICPi-AKI in Canada.<sup>14</sup> The 138 patients with ICPi-AKI described in our prior multicenter study<sup>15</sup> were not included in the current study.

## References

1. Kellum JA, Lameire N, Aspelin P, et al. Kidney disease: Improving global outcomes (KDIGO) acute kidney injury work group. KDIGO clinical practice guideline for acute kidney injury. *Kidney Int Suppl.* 2012.
2. Levey AS, Stevens LA, Schmid CH, et al. A new equation to estimate glomerular filtration rate. *Ann Intern Med.* 2009.
3. Isik B, Alexander MP, Manohar S, et al. Biomarkers, Clinical Features, and Rechallenge for Immune Checkpoint Inhibitor Renal Immune-Related Adverse Events. *Kidney Int Reports.* 2021.
4. Seethapathy H, Zhao S, Chute D, et al. The Incidence, Causes, and Risk Factors of Acute Kidney Injury in Patients Receiving Immune Checkpoint Inhibitors. *CJASN.* 2019;14(12):1692-1700.
5. Seethapathy H, Zhao S, Strohbehm IA, et al. Incidence and Clinical Features of Immune-Related Acute Kidney Injury in Patients Receiving Programmed Cell Death Ligand-1 Inhibitors. *Kidney Int Reports.* 2020.
6. Lee M, Seethapathy HS, Strohbehm IA. Rapid corticosteroid taper versus standard of care for immune checkpoint inhibitor induced nephritis: a single-center retrospective cohort study. *J Immunother Cancer.* 2021:In Press.
7. Lapman S, Whittier WL, Parikh R, et al. Immune checkpoint inhibitor–associated renal amyloid A amyloidosis: A case series and review of the literature. *J Onco-Nephrology.* 2020;4(1-2).
8. Oleas D, Bolufer M, Agraz I, et al. Acute interstitial nephritis associated with immune checkpoint inhibitors: a single-centre experience. *Clin Kidney J.* 2020.
9. García-Carro C, Bolufer M, Bury R, et al. Acute kidney injury as a risk factor for mortality in oncological patients receiving check-point inhibitors. *Nephrol Dial Transplant.* 2021.
10. Draibe JB, García-Carro C, Martínez-Valenzuela L, et al. Acute tubulointerstitial nephritis induced by checkpoint inhibitors versus classical acute tubulointerstitial nephritis: are they the same disease? *Clin Kidney J.* 2020.
11. Mamlouk O, Selamet U, Machado S, et al. Nephrotoxicity of immune checkpoint inhibitors beyond tubulointerstitial nephritis: single-center experience. *J Immunother Cancer.* 2019.
12. Spakowicz D, Hoyd R, Muniak M, et al. Inferring the role of the microbiome on survival in patients treated with immune checkpoint inhibitors: Causal modeling, timing, and classes of concomitant medications. *BMC Cancer.* 2020;20(1).
13. Owen DH, Wei L, Bertino EM, et al. Incidence, Risk Factors, and Effect on Survival of Immune-related Adverse Events in Patients With Non–Small-cell Lung Cancer. *Clin Lung Cancer.* 2018;19(6).
14. Meraz-Muñoz A, Amir E, Ng P, et al. Acute kidney injury associated with immune checkpoint inhibitor therapy: Incidence, risk factors and outcomes. *J Immunother Cancer.* 2020;8(1).
15. Cortazar FB, Kibbelaar Z, Glezerman IG, et al. Clinical Features and Outcomes of Immune Checkpoint Inhibitor-associated AKI: a multicenter study. *JASN.* 2020;31(2):435-446.

Confidential

Multicenter study of ICPI-AKI--version 2

Page 1

## Confirmation of eligibility

Study ID \_\_\_\_\_

Did the patient have a  $\geq 100\%$  increase (i.e., doubling) of serum creatinine (SCr) relative to baseline, or the need for renal replacement therapy?  Yes  No

Note: Baseline SCr refers to the nearest value prior to initiation of immune checkpoint inhibitor (ICPi) therapy

Was the AKI attributed to the ICPI by the treating provider?  Yes  No

\*The patient must have received ICPI within 180 days of the AKI

STOP, THIS PATIENT IS NOT ELIGIBLE

THIS PATIENT IS ELIGIBLE, please proceed with data entry

Did the patient have a  $\geq 50\%$  increase in SCr from baseline?  Yes  No

Note: Baseline SCr refers to the nearest value prior to initiation of immune checkpoint inhibitor (ICPi) therapy

Was the AKI attributed the ICPI by the treating provider?  Yes  No

Does the patient fulfill one or more of the following criteria?  Yes  No

- 1) Tubulointerstitial nephritis on biopsy
- 2) ICPI was held for at least one cycle due to concern for ICPI-AKI
- 3) The patient was treated with steroids due to concern for ICPI-AKI

Which of the following criteria did the patient meet (check one or more)  Tubulointerstitial nephritis on biopsy  ICPI was held for at least one cycle due to concern for ICPI-AKI  The patient was treated with steroids due to concern for ICPI-AKI

STOP, THIS PATIENT IS NOT ELIGIBLE

Did this patient have a history of a renal transplant?  Yes  No

STOP, THIS PATIENT IS NOT ELIGIBLE

THIS PATIENT IS ELIGIBLE, please proceed with data entry

09/07/2021 8:16pm

projectredcap.org

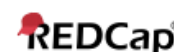

Confidential

Multicenter study of ICPI-AKI--version 2

Page 2

## Demographics

**Unless otherwise indicated, the timing of the data below refers to initiation of immune checkpoint inhibitor (ICPi) therapy**

Age (years) at time of AKI

\_\_\_\_\_

Gender

- Male  
 Female

Race

- White  
 Black  
 Asian  
 Unknown

Select assessment(s) of proteinuria performed within 6 months prior to initiation of ICPI therapy (if any were performed more than once, use the most recent value)

- None  
 Spot urine protein to creatinine ratio  
 Spot urine albumin to creatinine ratio  
 24 hr urine collection  
 Urinalysis

Enter the most recent spot urine protein:Cr ratio (g/g) prior to ICPI therapy

\_\_\_\_\_

For example, enter "3" if the patient had 3 g protein per g of creatinine

Enter the most recent albumin:Cr ratio (mg/g) prior to ICPI therapy

\_\_\_\_\_

For example, enter "30" if the patient had 30 mg albumin per gram of creatinine

Enter the most recent 24 hr urine collection for protein (g/day) prior to ICPI therapy

\_\_\_\_\_

Enter the results of the most recent urine protein quantification by urinalysis prior to ICPI therapy

- neg/trace  
 1+  
 2+  
 3+  
 4+

Weight (kg)

\_\_\_\_\_

Pay careful attention to the units and enter the weight in kg, not lbs

Height (cm)

\_\_\_\_\_

Pay careful attention to the units and enter the height in cm, not inches

Confidential

Page 3

---

Baseline serum creatinine (SCr) . Please enter in mg/dl

\_\_\_\_\_  
(\*Serum creatinine should be in mg/dl)

Note: Baseline SCr refers to the nearest value prior to initiation of ICPI therapy

---

Was a CBC with differential performed within three months prior to initiation of ICPI therapy?

- Yes  
 No

---

What was the total white blood cell (WBC) count?

\_\_\_\_\_  
(If more than one CBC with diff was performed within 3 months prior to ICPI initiation, use the closest one)

---

What was the neutrophil percentage? (enter as a number between 0 to 100, and without a "%" sign)

\_\_\_\_\_  
(If more than one CBC with diff was performed within 3 months prior to ICPI initiation, use the closest one)

---

What was the lymphocyte percentage? (enter as a number between 0 to 100, and without a "%" sign)

\_\_\_\_\_  
(If more than one CBC with diff was performed within 3 months prior to ICPI initiation, use the closest one)

---

What was the eosinophil percentage? (enter as a number between 0 to 100, and without a "%" sign)

\_\_\_\_\_  
(If more than one CBC with diff was performed within 3 months prior to ICPI initiation, use the closest one)

---

What was the platelet count? (enter as a two- or three-digit number)

\_\_\_\_\_  
(If more than one CBC with diff was performed within 3 months prior to ICPI initiation, use the closest one)

---

Malignancy treated with ICPI

- Melanoma  
 Lung adenocarcinoma  
 Lung squamous cell  
 Lung small cell  
 Head and neck cancer  
 Renal Cell  
 Bladder/Urothelial  
 Pancreatic  
 Hodgkin Lymphoma  
 Non-Hodgkin Lymphoma  
 Other

---

Specify other malignancy

\_\_\_\_\_



Confidential

Page 4

---

Past medical history (check all that apply)

- Hypertension
- Diabetes mellitus
- Chronic kidney disease (eGFR < 60 ml/min/1.73m<sup>2</sup> for > 3 months)
- Congestive heart failure
- COPD
- Chronic liver disease
- None of above

---

Enter other relevant past medical history (e.g., history of solid organ transplantation)

---

---

What is the presumed cause of CKD?

- Hypertension
- Diabetes
- Other
- Unknown

---

Enter cause of CKD

---

---

History of autoimmune disease (check all that apply)

\*\*Note, we are specifically looking for autoimmune disease that was present PRIOR to initiation of ICPI therapy, not an immune-related adverse event that happened AFTER starting the ICPI

- None
- Type 1 diabetes mellitus
- Asthma
- Psoriasis
- Grave's Disease
- Hashimoto's thyroiditis
- Systemic lupus
- Rheumatoid arthritis
- ANCA vasculitis
- Inflammatory bowel disease (UC or Crohn's)
- Celiac disease
- Primary biliary cirrhosis/sclerosing cholangitis
- Autoimmune hepatitis
- Other

---

Other autoimmune disease

---

---

Comments

---

Confidential

Multicenter study of ICPI-AKI--version 2

Page 5

## ICPi Treatment

**All questions in this section refer to ICPI therapy administered PRIOR to the initial episode of AKI**

Date of initiation of ICPI therapy

\_\_\_\_\_

Did the patient ever receive simultaneous (i.e., at the same point in time) combination therapy with a CTLA-4 inhibitor AND a PD-1/PD-L1 inhibitor prior to AKI?

- Yes  
 No

Check the CTLA-4 inhibitor the patient received simultaneously with a PD-1/PD-L1 inhibitor.

- ipilimumab (CTLA-4)  
 tremelimumab (CTLA-4)  
 other

Other CTLA-4 inhibitor

\_\_\_\_\_

Check the PD-1/PD-L1 inhibitor the patient received simultaneously with a CTLA-4 inhibitor.

- nivolumab (PD-1)  
 pembrolizumab (PD-1)  
 atezolizumab (PD-L1)  
 avelumab (PD-L1)  
 durvalumab (PD-L1)  
 other

Other PD-1/PD-L1 inhibitor

\_\_\_\_\_

Check all ICPIs ever received prior to first episode of AKI

- ipilimumab (CTLA-4)  
 tremelimumab (CTLA-4)  
 nivolumab (PD-1)  
 pembrolizumab (PD-1)  
 atezolizumab (PD-L1)  
 avelumab (PD-L1)  
 durvalumab (PD-L1)  
 other

Other ICPI

\_\_\_\_\_

Check all ICPIs received within 8 weeks prior to the first episode of AKI. If ICPI therapy had already been completed/discontinued >8 weeks prior to AKI, provide the last ICPI regimen given prior to AKI

- ipilimumab (CTLA-4)  
 tremelimumab (CTLA-4)  
 nivolumab (PD-1)  
 pembrolizumab (PD-1)  
 atezolizumab (PD-L1)  
 avelumab (PD-L1)  
 durvalumab (PD-L1)  
 other

Other ICPI

\_\_\_\_\_

Date of last ICPI dose prior to initial episode of AKI

\_\_\_\_\_

*Confidential*

Page 6

---

Comments

---

Confidential

Multicenter study of ICPI-AKI--version 2

Page 7

## AKI clinical features

Was the patient hospitalized as a result of their ICPI-AKI?  Yes  No

Was a nephrologist involved in the management of the ICPI-AKI?  Yes  No

Did the patient have any EXTRA-renal immune-related adverse events in which the onset was prior to AKI? (defined as an onset occurring >14 days before AKI was first detected)  Yes  No

Select all extra-renal adverse events prior to AKI

- Rash
- Colitis
- Hepatitis
- Pneumonitis
- Thyroid disease
- Hypophysitis
- Primary Adrenal Insufficiency
- Type 1 DM
- Myocarditis
- Other (free text)

Provide other immune related adverse event prior to AKI \_\_\_\_\_

Did the patient have any EXTRA-renal immune-related adverse events in which the onset was concurrent with the AKI? (defined as an onset occurring within 14 days prior to or after AKI was first detected)  Yes  No

Select all extra-renal immune related adverse events occurring concomitantly with AKI

- Rash
- Colitis
- Hepatitis
- Pneumonitis
- Thyroid disease
- Hypophysitis
- Primary Adrenal Insufficiency
- Type 1 DM
- Myocarditis
- Other (free text)

Provide other immune related adverse events occurring concomitantly with AKI \_\_\_\_\_

Did the patient take any of the following within 14 days preceding detection of AKI?  Antibiotics  NSAIDs  Proton pump inhibitors

Which antibiotic did patient receive? \_\_\_\_\_

Did the patient receive cisplatin within a month prior to AKI diagnosis?  Yes  No

Confidential

Page 8

Why was the AKI attributed to the ICPI instead of the cisplatin?

---

Did the patient receive a tyrosine kinase inhibitor (TKI) and/or a vascular endothelial growth factor (VEGF) inhibitor within a month prior to AKI diagnosis?

- Yes  
 No  
(ex: aflibercept, axitinib, bevacizumab, cabozantinib, dasatinib, erlotinib, gefitinib, imatinib, levantinib, nilotinib, pazopanib, ponatinib, ramucirumab, ranibizumab, regorafenib, sorafenib, sunitinib)

Which tyrosine kinase and/or VEGF inhibitor did the patient receive?

- aflibercept (Zaltrap)  
 axitinib (Inlyta)  
 bevacizumab (Avastin)  
 cabozantinib (Cabometyx)  
 dasatinib (Sprycel)  
 erlotinib (Tarceva)  
 gefitinib (Iressa)  
 imatinib (Gleevec)  
 levantinib (Lenvima)  
 nilotinib (Tasigna)  
 pazopanib (Votrient)  
 ponatinib (Iclusig)  
 ramucirumab (Cyramza)  
 ranibizumab (Lucentis)  
 regorafenib (Stivarga)  
 sorafenib (Nexavar)  
 sunitinib (Sutent)  
 other

Which other TKI/VEGF inhibitor did the patient receive?

---

Why was the AKI attributed to the ICPI instead of the TKI/VEGF inhibitor?

---

Did the patient receive another potentially nephrotoxic chemotherapy agent within a month prior to AKI diagnosis?

- Yes  
 No

Which potentially nephrotoxic chemotherapy agent did the patient receive?

---

(ex: gemcitabine, carboplatin)

Why was the AKI attributed to the ICPI instead of the chemotherapy agent?

---

Was the patient already receiving glucocorticoids for an alternative condition when AKI was first detected?

- Yes  
 No

Enter the daily dose of glucocorticoids (in prednisone equivalents) the patient was already receiving when AKI was first detected

---

A steroid conversion calculator can be found here:  
<https://www.mdcalc.com/steroid-conversion-calculator>

Confidential

Page 9

Enter the reason the patient was already receiving glucocorticoids when AKI was first detected (e.g., to treat an extra-renal immune related adverse event)

\_\_\_\_\_

You indicated that this patient had a  $\geq 50\%$  (i.e.,  $\geq 1.5$ -fold) increase in SCr relative to baseline. Enter the date the patient first had a  $\geq 50\%$  increase in SCr.

\_\_\_\_\_

You indicated that this patient had a  $\geq 100\%$  increase (i.e., doubling) in SCr relative to baseline. Enter the date the patient first had a  $\geq 100\%$  increase in SCr.

\_\_\_\_\_

SCr (mg/dl) at time point when patient first fulfilled criteria for AKI

\_\_\_\_\_ (Please ensure serum creatinine is in mg/dl)

Peak SCr (mg/dl) during AKI episode (limit to within 4 weeks of AKI diagnosis)

\_\_\_\_\_ (Please ensure serum creatinine is in mg/dl)

Quantification of proteinuria during AKI (check all that apply)

- none  
 spot urine protein:Cr ratio  
 spot urine albumin:Cr ratio (microalbumin)  
 24 hour urine collection for protein  
 (\*Please indicate any quantification within 7 days AFTER AKI onset)

Spot urine protein:Cr ratio (g/g) at AKI diagnosis

For example, enter "3" if the patient had 3 g protein per gram of creatinine

\_\_\_\_\_ (\*Please indicate value within 7 days AFTER AKI onset)

Spot urine albumin:Cr ratio (mg/g) at AKI diagnosis

For example, enter "30" if the patient had 30 mg albuminuria per gram of creatinine

\_\_\_\_\_ (\*Please indicate value within 7 days AFTER AKI onset)

24 hr urine collection for protein (g/day) at AKI diagnosis

\_\_\_\_\_ (\*Please indicate value within 7 days AFTER AKI onset)

Urinalysis (urine dipstick) performed?

- Yes  
 No

Initial dipstick protein at AKI diagnosis

- neg/trace  
 1+  
 2+  
 3+  
 4+

Confidential

Page 10

|                                                                                                                              |                                                                                                                                                                              |
|------------------------------------------------------------------------------------------------------------------------------|------------------------------------------------------------------------------------------------------------------------------------------------------------------------------|
| Initial dipstick leukocyte esterase at AKI diagnosis                                                                         | <input type="radio"/> neg/trace<br><input type="radio"/> 1+<br><input type="radio"/> 2+<br><input type="radio"/> 3+                                                          |
| Initial dipstick blood at AKI diagnosis                                                                                      | <input type="radio"/> neg/trace<br><input type="radio"/> 1+<br><input type="radio"/> 2+<br><input type="radio"/> 3+<br><input type="radio"/> N/A (taken from foley catheter) |
| Review of urine sediment with microscopy performed? (either sent to the clinical lab or reviewed manually by a nephrologist) | <input type="radio"/> Yes<br><input type="radio"/> No                                                                                                                        |
| List all urine microscopy findings at AKI diagnosis                                                                          | <p>(*Please include findings like 10-20 WBCs per hpf, RBCs, casts, renal tubular epithelial cells, etc.)</p>                                                                 |
| Was a CBC with differential performed within one week before or after AKI diagnosis?                                         | <input type="radio"/> Yes<br><input type="radio"/> No                                                                                                                        |
| What was the total white blood cell (WBC) count?                                                                             | <p>(if more than one CBC with diff was performed within 1 week before or after AKI diagnosis, please list the closest value)</p>                                             |
| What was the neutrophil percentage? (enter as a number between 0 to 100, and without a "%" sign)                             | <p>(if more than one CBC with diff was performed within 1 week before or after AKI diagnosis, please list the closest value)</p>                                             |
| What was the lymphocyte percentage? (enter as a number between 0 to 100, and without a "%" sign)                             | <p>(if more than one CBC with diff was performed within 1 week before or after AKI diagnosis, please list the closest value)</p>                                             |
| What was the eosinophil percentage? (enter as a number between 0 to 100, and without a "%" sign)                             | <p>(if more than one CBC with diff was performed within 1 week before or after AKI diagnosis, use the closest one)</p>                                                       |
| What was the platelet count?                                                                                                 | <p>(if more than one CBC with diff was performed within 1 week before or after AKI diagnosis, please list the closest value)</p>                                             |
| Renal ultrasound performed within 14 days of AKI diagnosis?                                                                  | <input type="radio"/> Yes<br><input type="radio"/> No                                                                                                                        |
| Right kidney size (cm)                                                                                                       | <p>_____</p>                                                                                                                                                                 |

Confidential

Page 11

---

 Left Kidney size (cm)
 

---



---

 Was a renal biopsy performed?

- Yes  
 No

---

 Paste the entire biopsy report, including light microscopy, immunofluorescence, and electron microscopy (remove patient name and MRN)
 

---



---

 Was tubulointerstitial nephritis the primary lesion on biopsy?

- Yes  
 No

---

 Did another lesion co-occur with tubulointerstitial nephritis on biopsy?

- Yes  
 No

---

 What was the lesion on biopsy?

- IgA nephropathy  
 Pauci-immune glomerulonephritis  
 Minimal change disease  
 Membranous nephropathy  
 Thrombotic microangiopathy  
 Paraprotein-associated disease  
 Acute tubular necrosis/injury (ATN/ATI)  
 Other

---

 Please describe the other lesion on biopsy
 

---



---

 Antinuclear antibody (ANA)

- Not performed  
 Negative  
 Positive  
 (\*Only refers to testing performed within 2 weeks before or after AKI onset)

---

 Anti-dsDNA

- Not performed  
 Negative  
 Positive  
 (\*Only refers to testing performed within 2 weeks before or after AKI onset)

---

 C3 level

- Not performed  
 Normal/High  
 Low  
 (\*Only refers to testing performed within 2 weeks before or after AKI onset)

---

 C4 level

- Not performed  
 Normal/High  
 Low  
 (\*Only refers to testing performed within 2 weeks before or after AKI onset)

---

 ANCA

- Not performed  
 Negative  
 Positive  
 (\*Only refers to testing performed within 2 weeks before or after AKI onset)



*Confidential*

Page 12

---

Did the patient receive PET imaging within 2 weeks before or after AKI diagnosis?  Yes  No

---

Please list any imaging results relevant to the kidneys

---

---

Comments

---

Confidential

Multicenter study of ICPI-AKI--version 2

Page 13

## AKI Management

### Questions in this section refer to the initial episode of ICPI-associated AKI

How was ICPI therapy managed at the time of AKI?  Held  
 Same regimen continued without interruption  
 Planned ICPI therapy already completed at time of AKI

Was the AKI treated with glucocorticoids?  Yes  
 No

Why was glucocorticoid therapy withheld?

\_\_\_\_\_

Date of initiation of glucocorticoid therapy

\_\_\_\_\_

Was the patient on dialysis at the time of glucocorticoid initiation?  Yes  
 No

Enter the SCr (mg/dl) at the time of glucocorticoid initiation

\_\_\_\_\_ (Please ensure units for SCr are mg/dl)

Did patient receive intravenous pulse glucocorticoids?  Yes  
 No

Enter number of glucocorticoid pulses received

\_\_\_\_\_

Enter the cumulative dose of pulse steroids in gram equivalents of methylprednisolone (Solumedrol). For example, if the patient received Solumedrol 500mg IV daily x 3 days, enter "1.5"

\_\_\_\_\_

Steroid conversion calculator can be found here:  
<https://www.mdcalc.com/steroid-conversion-calculator>

Enter the initial oral prednisone dose (or in prednisone equivalent units, in mg) at the time of AKI

\_\_\_\_\_

Steroid conversion calculator can be found here:  
<https://www.mdcalc.com/steroid-conversion-calculator>

Enter the date upon which prednisone was tapered to a dose  $\leq 10$  mg per day

\_\_\_\_\_

Was the patient treated with an immunosuppressive agent other than/in addition to glucocorticoids?  Yes  
 No

*Confidential*

Page 14

---

Enter the name of the alternative agent, route of administration, the dose, and the timing in relation to steroids (e.g., SCr remained elevated for 7 days following initiation of prednisone, and therefore cellcept 1g BID PO was added on day 8, and was continued for 30 days)

---

Comments

---

Confidential

Multicenter study of ICPI-AKI--version 2  
Page 15

## Treatment Outcomes

Did the patient achieve complete renal recovery? This is defined as a return of SCr to within 25% of the baseline SCr (the nearest value prior to ICPI initiation). Please limit response to the time period within 3 months following AKI diagnosis.

Yes  
 No

Enter the date when complete renal recovery was first achieved

\_\_\_\_\_

Did the patient require renal replacement therapy?

Yes  
 No

Select the date dialysis was initiated

\_\_\_\_\_

Was dialysis able to be discontinued? (Note: Select "No" if patient discontinued dialysis for palliative reasons and did not have renal recovery)

Yes  
 No

Select the date dialysis was discontinued

\_\_\_\_\_

Enter the nadir SCr (mg/dl) (i.e., the lowest value achieved) following liberation from dialysis. Limit time period to the 3 months following AKI episode.

\_\_\_\_\_

(Note: do not use any values from within 7 days of dialysis)

Enter the nadir SCr (mg/dl) (i.e., the lowest value achieved) within 3 months following AKI onset.

\_\_\_\_\_

Select the date of the nadir SCr

\_\_\_\_\_

Enter SCr (mg/dl) at 7 days (+/- 3 days) after the date of AKI onset

\_\_\_\_\_  
(\*If no test was performed, enter N/A)

Enter SCr (mg/dl) at 14 days (+/- 3 days) after the date of AKI onset

\_\_\_\_\_  
(\*If no test was performed, enter N/A)

Enter SCr (mg/dl) at 21 days (+/- 3 days) from the date of the initial AKI episode

\_\_\_\_\_  
(\*If no test was performed, enter N/A)

Enter SCr (mg/dl) at 28 days (+/- 3 days) after the date of AKI onset

\_\_\_\_\_  
(\*If no test was performed, enter N/A)

Enter SCr (mg/dl) at 35 days (+/- 3 days) after the date of AKI onset

\_\_\_\_\_  
(\*If no test was performed, enter N/A)

Confidential

Page 16

Enter SCr (mg/dl) at 42 days (+/- 3 days) after the date of AKI onset

(\*If no test was performed, enter N/A)

Was the patient re-challenged with an ICPI after AKI

- Yes  
 No

Why was the patient not re-challenged?

- Death or transition to hospice  
 Occurrence of another more severe immune-related adverse event  
 Directly because of ICPI-AKI  
 Progression of disease on the ICPI  
 The patient was in remission  
 Other

Please enter another reason why the patient was not re-challenged with ICPI

\_\_\_\_\_

Enter date of re-challenge

\_\_\_\_\_

Enter SCr (mg/dl) at time of re-challenge

Note: If the patient was on dialysis at the time of re-challenge, enter "30"

\_\_\_\_\_

Enter prednisone dose (if any) in mg, in prednisone equivalent units, at time of re-challenge.

\_\_\_\_\_

Note: Enter "0" if patient not on prednisone at time of re-challenge

Select all ICPIs received during re-challenge

- ipilimumab(CTLA-4)  
 tremelimumab(CTLA-4)  
 nivolumab(PD-1)  
 pembrolizumab(PD-1)  
 atezolizumab(PD-L1)  
 avelumab(PD-L1)  
 durvalumab(PD-L1)  
 other

Enter other ICPI

\_\_\_\_\_

Was the patient on a potential tubulointerstitial nephritis-causing medication at the time of ICPI re-challenge (e.g., PPI, NSAIDs, antibiotics)?

- Yes  
 No

If the patient was on one of these medications at the time of re-challenge, which one(s) were they on?

- PPIs  
 NSAIDs  
 Antibiotics

Did ICPI-AKI recur with rechallenge?

- Yes  
 No

Note: ICPI-AKI defined as  $\geq 50\%$  increase in SCr from baseline and attributed to the ICPI. The baseline SCr here is the SCr at the time of ICPI re-challenge.

Confidential

Page 17

How long were they continued on immunotherapy, in # of cycles, from the date of re-challenge? \_\_\_\_\_

Definition of a cycle: a period of treatment followed by a period of rest (no treatment) that is repeated on a regular schedule. For example, treatment given once followed by three weeks of rest is one treatment cycle

Select date patient first fulfilled criteria for ICPI-AKI after re-challenge \_\_\_\_\_

Enter SCr (mg/dl) at time of diagnosis of ICPI-AKI after re-challenge \_\_\_\_\_

Enter peak SCr (mg/dl) following ICPI-AKI after re-challenge \_\_\_\_\_

How was ICPI therapy managed at the time of ICPI-AKI after re-challenge?

- Held  
 Same regimen continued without interruption  
 Planned ICPI therapy already completed at time of AKI

Was ICPI-AKI after re-challenge treated with glucocorticoids? \_\_\_\_\_

- Yes  
 No

Why was glucocorticoid therapy withheld? \_\_\_\_\_

Date of initiation of glucocorticoid therapy for ICPI-AKI after re-challenge \_\_\_\_\_

Did patient receive intravenous pulse glucocorticoids for ICPI-AKI after re-challenge? \_\_\_\_\_

- Yes  
 No

Enter number of glucocorticoid pulses received \_\_\_\_\_

Enter the cumulative dose of pulse steroids in gram equivalents of methylprednisolone (Solumedrol). For example, if the patient received Solumedrol 500mg IV daily x 3 days, enter "1.5" \_\_\_\_\_

Steroid conversion calculator can be found here:  
<https://www.mdcalc.com/steroid-conversion-calculator>

Enter the initial oral steroid dose (or in prednisone equivalent units, in mg) at the time of ICPI-AKI \_\_\_\_\_

Steroid conversion calculator can be found here:  
<https://www.mdcalc.com/steroid-conversion-calculator>

Enter the date upon which prednisone was tapered to a dose  $\leq 10$  mg per day \_\_\_\_\_

Confidential

Page 18

---

Was the patient on dialysis at the time of glucocorticoid initiation?  Yes  
 No

---

Was the patient treated with an immunosuppressive agent other than/in addition to glucocorticoids?  Yes  
 No

---

Enter the name of the alternative agent, route of administration, the dose, and the timing in relation to steroids (e.g., SCr remained elevated for 7 days following initiation of prednisone, and therefore cellcept 1g BID PO was added on day 8, and was continued for 30 days) \_\_\_\_\_

---

Did the patient achieve complete renal recovery from ICPI-AKI after re-challenge? This is defined as a return of SCr to within 25% of the baseline SCr (the nearest value prior to ICPI initiation). Please limit response to the time period within 3 months following AKI diagnosis.  Yes  
 No

---

Enter the date when complete renal recovery was achieved after re-challenge. \_\_\_\_\_

---

Did patient require dialysis for ICPI-AKI after re-challenge?  Yes  
 No

---

Enter the date dialysis was initiated \_\_\_\_\_

---

Was dialysis able to be discontinued? (Note: Select "No" if patient discontinued dialysis for palliative reasons and did not have renal recovery)  Yes  
 No

---

Select the date dialysis was discontinued \_\_\_\_\_

---

Enter the nadir SCr (mg/dl) (i.e., the lowest value achieved) following liberation from dialysis. Limit time period to the 3 months following re-challenge ICPI-AKI episode. \_\_\_\_\_

(Note: do not use any values from within 7 days of dialysis)

---

Enter the nadir SCr (mg/dl) (i.e., the lowest value achieved) within 3 months following re-challenge ICPI-AKI onset. \_\_\_\_\_

---

Select the date of nadir SCr \_\_\_\_\_

---

Enter the date of last patient follow-up \_\_\_\_\_

---

Survival status at last follow-up  Alive  
 Deceased

*Confidential*

Page 19

---

Enter the most recent SCr (mg/dl) value

Note: Enter 30 if patient on dialysis

---

Date of most recent SCr value (mg/dl)

---

Were the dates provided actual dates or were they dummy coded?

- Actual dates  
 Dummy-coded

---

Comments

---
